# Supplementary material
Source: PubMed Central journal article supplement (PMC2522306)
Supplement: NIHMS63467-supplement-Supporting_Inf.pdf [file NIHMS63467-supplement-Supporting_Inf.pdf]

Supporting Information for

## A simple, rapid method for the preparation of [ $^{11}\text{C}$ ] formaldehyde

Jacob M. Hooker,<sup>\*,†</sup> Matthias Schönberger,<sup>‡</sup> Hanno Schieferstein,<sup>‡</sup> and Joanna S. Fowler<sup>†,§,^</sup>

<sup>†</sup>Medical Department, Brookhaven National Laboratory, Upton, NY 11973; <sup>‡</sup>Johannes Gutenberg-University at Mainz, Mainz, Germany; <sup>§</sup>University of Department of Chemistry, State University of New York at Stony Brook, Stony Brook, NY 11794-3400; <sup>^</sup>Department of Psychiatry, Mount Sinai School of Medicine, New York, NY 10029

\*Corresponding author email address: hooker@bnl.gov

**General.** All chemicals were purchased from Sigma-Aldrich (USA) and used without additional purification. Reactions were carried out in anhydrous solvents (unless otherwise noted).

**Carbon-11 Chemistry:** [ $^{11}\text{C}$ ]Carbon dioxide was generated by an EBCO cyclotron by the nuclear reaction,  $^{14}\text{N}(\text{p},\alpha)^{11}\text{C}$ , using a nitrogen/oxygen (1000 ppm) target and transferred in a nitrogen stream to a PETtrace MeI Microlab for automated synthesis of [ $^{11}\text{C}$ ]methyl iodide. During radiosynthesis, carbon-11 was measured using a Capintec CRC-712MV radioisotope calibrator (Capintec Inc., Ramsey, NJ, USA). For dimedone precipitation experiments,  $^{11}\text{C}$  radioactivity was measured by a Packard MINAXI  $\gamma$  5000 automated gamma counter (Packard Instrument, Meriden, CT). All measurements were decay corrected.

**Chromatography:** Semipreparative and analytical high performance liquid chromatography (HPLC) were performed using a Knauer HPLC system (Sonntek Inc., Woodcliff Lake, NJ, USA) with a model K-5000 pump, a model 87 variable wavelength monitor and NaI radioactivity detector. Specific activity was determined by measuring the radioactivity and the mass; the latter is derived from a standard curve at UV (254 nm) using different concentrations of the authentic reference compounds. (Column and eluent conditions are given in the experimental section). Radiochemical purity was also determined by thin-layer chromatography (TLC) using Macherey–Nagel polygram sil G/UV254 plastic-backed TLC plates and measuring radioactivity distribution on with Bioscan system 200 imaging scanner (Bioscan Inc., Washington, DC).

**Nuclear Magnetic Resonance.**  $^1\text{H}$  and  $^{13}\text{C}$  NMR spectra were measured with a Bruker DRX 400 MHz spectrometer.  $^1\text{H}$  and  $^{13}\text{C}$  NMR chemical shifts are reported as  $\delta$  in units of parts per million (ppm) relative to acetonitrile- $d_3$  ( $^1\text{H}$ :  $\delta$  1.95, pentet;  $^{13}\text{C}$ :  $\delta$  1.39, septet).

### Experimental

#### NMR Monitored reactions of trimethylamine-*N*-oxide (TMAO) with methyl iodide (MeI):

**Excess MeI:** TMAO (7.5 mg, 0.1 mmol, 1 eqv x 2) was dissolved in 1.25 mL of  $d_3$ -MeCN. The sample was divided into two portions, which were added to either 35.5 mg [ $^{12}\text{C}$ ]-MeI (0.5 mmol, 10 eqv) or 36.7 mg [ $^{13}\text{C}$ ]-MeI (0.5 mmol, 10 eqv). While the initial stoichiometry was carefully controlled, the final stoichiometry was

approximate due to the volatility of MeI. Each solution was mixed using a Pasteur pipette and transferred to an NMR tube, which was subsequently flame sealed.  $^1\text{H}$  and  $^{13}\text{C}$  spectra were recorded.

**Excess TMAO:** TMAO (37.6 mg, 0.5 mmol, 5 eqv x 2) was dissolved in 1.25 mL of  $\text{d}_3\text{-MeCN}$ . The sample was divided into two portions which were added to either 7.3 mg [ $^{12}\text{C}$ ]-MeI (0.05 mmol, 1.0 eqv) or 7.6 mg [ $^{13}\text{C}$ ]-MeI (0.05 mmol, 5.0 eqv) in a dram vial. The vial was capped and heated to 70 °C for 1 min then cooled to RT. A small amount of white, crystalline precipitate was observed (determined to be  $\text{Me}_3\text{NHI}$ ). The mixture was transferred to an NMR tube, which was subsequently flame sealed.  $^1\text{H}$  and  $^{13}\text{C}$  spectra were recorded.

**[ $^{11}\text{C}$ ]Formaldehyde reaction condition screens.** [ $^{11}\text{C}$ ]-MeI in a stream of nitrogen gas was trapped in 1.0 mL of a given solvent (DMF at -40 °C, DMSO at RT, or MeCN at 0 °C, THF at -40 °C). This solution was subsequently divided into three 300  $\mu\text{L}$  aliquots (typically 0.5-1.0 mCi), which were added to three vials containing TMAO (masses given in Table 1). Each vial was capped placed in a heating block at 70 °C for a given reaction time. At the end of the reaction time, the vials were removed from the heating block and immediately placed into an ice/water bath. Analysis of the samples was accomplished by dimedone precipitation.

**Dimedone precipitation:** An aliquot (10  $\mu\text{L}$ ) of the crude [ $^{11}\text{C}$ ]formaldehyde solution was added to an aqueous solution of formaldehyde (400  $\mu\text{L}$ , 30% w/w). To this solution was added a solution of dimedone (160 mg in 30:70 MeOH:H $_2$ O). After measuring the radioactivity, the vessel was sealed and heated to 100 °C for 10 min. After cooling to RT, the precipitate was separated from the supernatant by either centrifugation or filtration and the radioactivity of each was measured.

**Pictet-Spengler Reaction of tryptamine and [ $^{11}\text{C}$ ]formaldehyde to form [ $^{11}\text{C}$ ]-2,3,4,9-tetrahydro-1H-beta-carboline:** A mixture of trimethylamine-*N*-oxide or its hydrate (4 mg, ~0.05 mmol) and DMF (300  $\mu\text{L}$ ) cooled to -40 °C in a tall thin reaction vial was used to capture  $^{11}\text{CH}_3\text{I}$  from a stream of nitrogen gas. The sealed vessel was heated to 70 °C for 2 min. The solution was then treated with a solution of DMF (100  $\mu\text{L}$ ) containing tryptamine (8 mg, 0.05 mmol) and *p*-toluene sulfonic acid (29 mg, 0.15 mmol) and heating was continued for 5 min. To the solution was added 1.0 mL of HPLC solvent (15% MeCN / 85% 0.1M aqueous ammonium formate) and the entire contents were loaded onto a Phenomenex Gemini C18 column (250 x 10 mm, 5  $\mu$ ). [ $^{11}\text{C}$ ]-2,3,4,9-tetrahydro-1H-beta-carboline, eluting at 22 min, was collected and the radioactivity measured. A portion of eluted product was subjected to analytical HPLC (C18 Luna, same eluent) and TLC ( $\text{Et}_3\text{N}:\text{MeOH}$ ), each indicating greater than 99% radiochemical purity.

Current Data Parameters  
 NAME jmh01\_77a  
 EXPNO 3  
 PROCNO 1

F2 Acquisition Parameters  
 Date\_ 20080114  
 Time\_ 15.50  
 INSTRUM spect  
 PROBHD 5 mm QNP 1H/13  
 PULPROG zg30  
 TD 32000  
 SOLVENT CDC13  
 NS 64  
 DS 2

SWH 6009.615 Hz  
 FIDRES 0.187800 Hz  
 AQ 2.6625333 sec  
 RG 574.7  
 DW 83.200 usec  
 DE 6.00 usec  
 TE 297.2 K

D1 1.00000000 sec  
 MCREST 0.00000000 sec  
 MCWRK 0.01500000 sec

==== CHANNEL f1 =====  
 NUC1 1H  
 P1 10.90 usec  
 PL1 1.00 dB  
 SFO1 400.1324710 MHz

F2 Processing parameters  
 SI 32768  
 SF 400.1300407 MHz  
 WDW EM  
 SSB 0  
 LB 0.30 Hz  
 GB 0  
 PC 1.40

Hooker (Standard Proton Parameters)  
 TMAO + [12C]MeI (excess)

1.94  
1.95  
1.96  
1.99  
2.18  
2.36  
3.86  
3.90  
3.91  
3.96  
3.98  
3.99  
3.15  
3.29

4.77

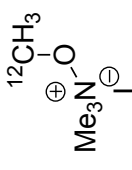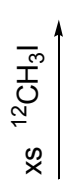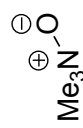

9.61

9.61

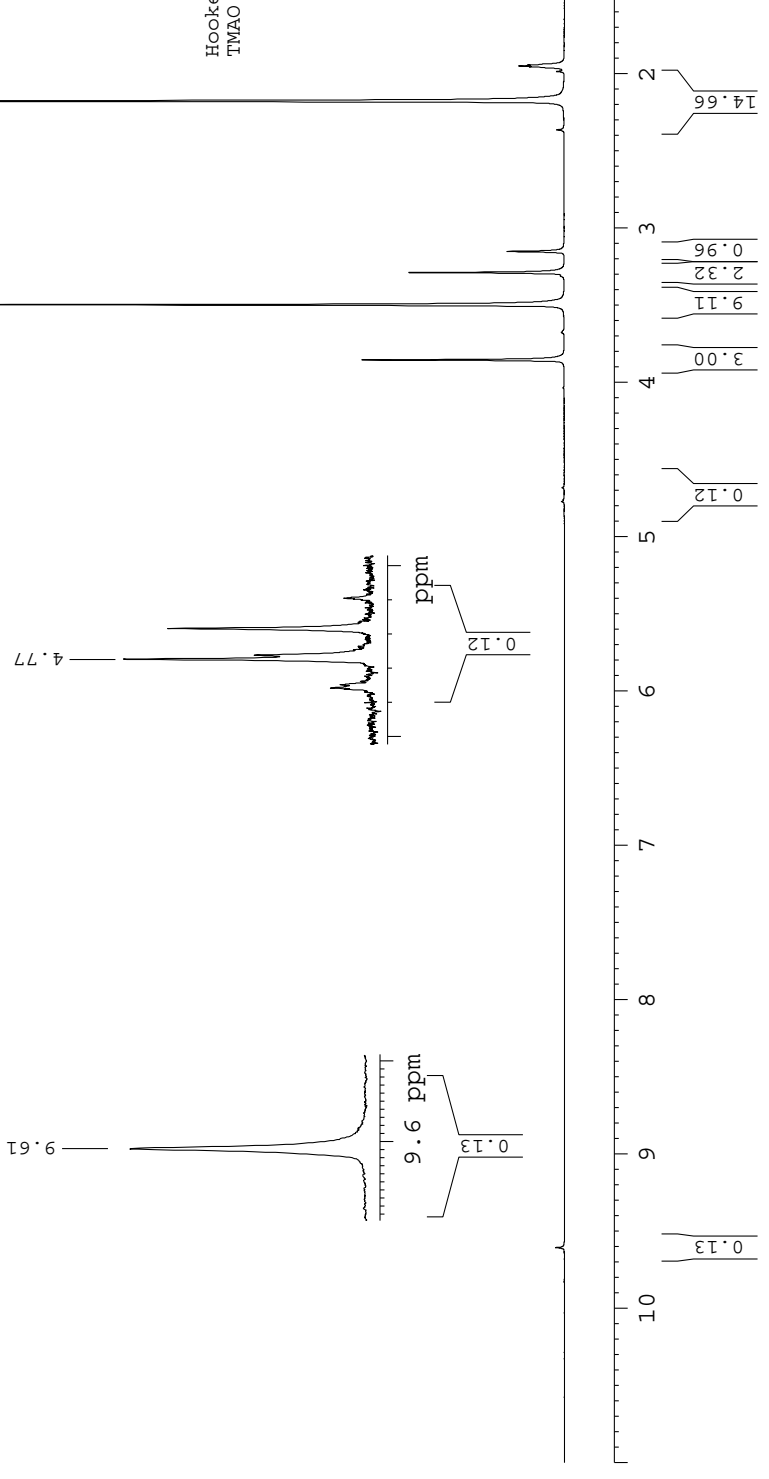

10 9 8 7 6 5 4 3 2 1 0 ppm

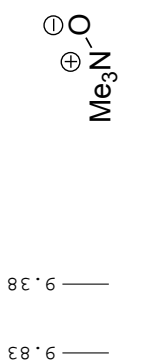

xs  $^{13}\text{CH}_3\text{I}$

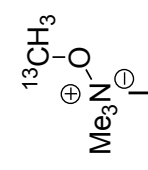

9.83  
 9.38  
 4.04  
 3.85  
 3.67  
 3.50  
 3.33  
 3.30  
 3.15  
 3.15  
 2.97  
 2.36  
 2.18  
 1.99  
 1.96  
 1.96  
 1.95  
 1.94

Current Data Parameters  
 NAME jmh01\_77a  
 EXPNO 6  
 PROCNO 1  
 F2 Acquisition Parameters  
 Date\_ 20080114  
 Time 17.19  
 INSTRUM spect  
 PROBHD 5 mm QNP 1H/13  
 PULPROG zg30  
 TD 32000  
 SOLVENT MeOH  
 NS 64  
 DS 2  
 SWH 6009.615 Hz  
 FIDRES 0.187800 Hz  
 AQ 2.6625333 sec  
 RG 574.7  
 DW 83.200 usec  
 DE 6.00 usec  
 TE 297.2 K  
 D1 1.00000000 sec  
 MCREST 0.00000000 sec  
 MCWRK 0.01500000 sec  
 ===== CHANNEL f1 =====  
 NUC1 1H  
 P1 10.90 usec  
 PL1 1.00 dB  
 SFO1 400.1324710 MHz  
 F2 Processing parameters  
 SI 32768  
 SF 400.1300421 MHz  
 WDW EM  
 SSB 0  
 LB 0.30 Hz  
 GB 0  
 PC 1.40

Hooker (Standard Proton Parameters)  
 TMAO +  $^{13}\text{C}$ MeI (excess)

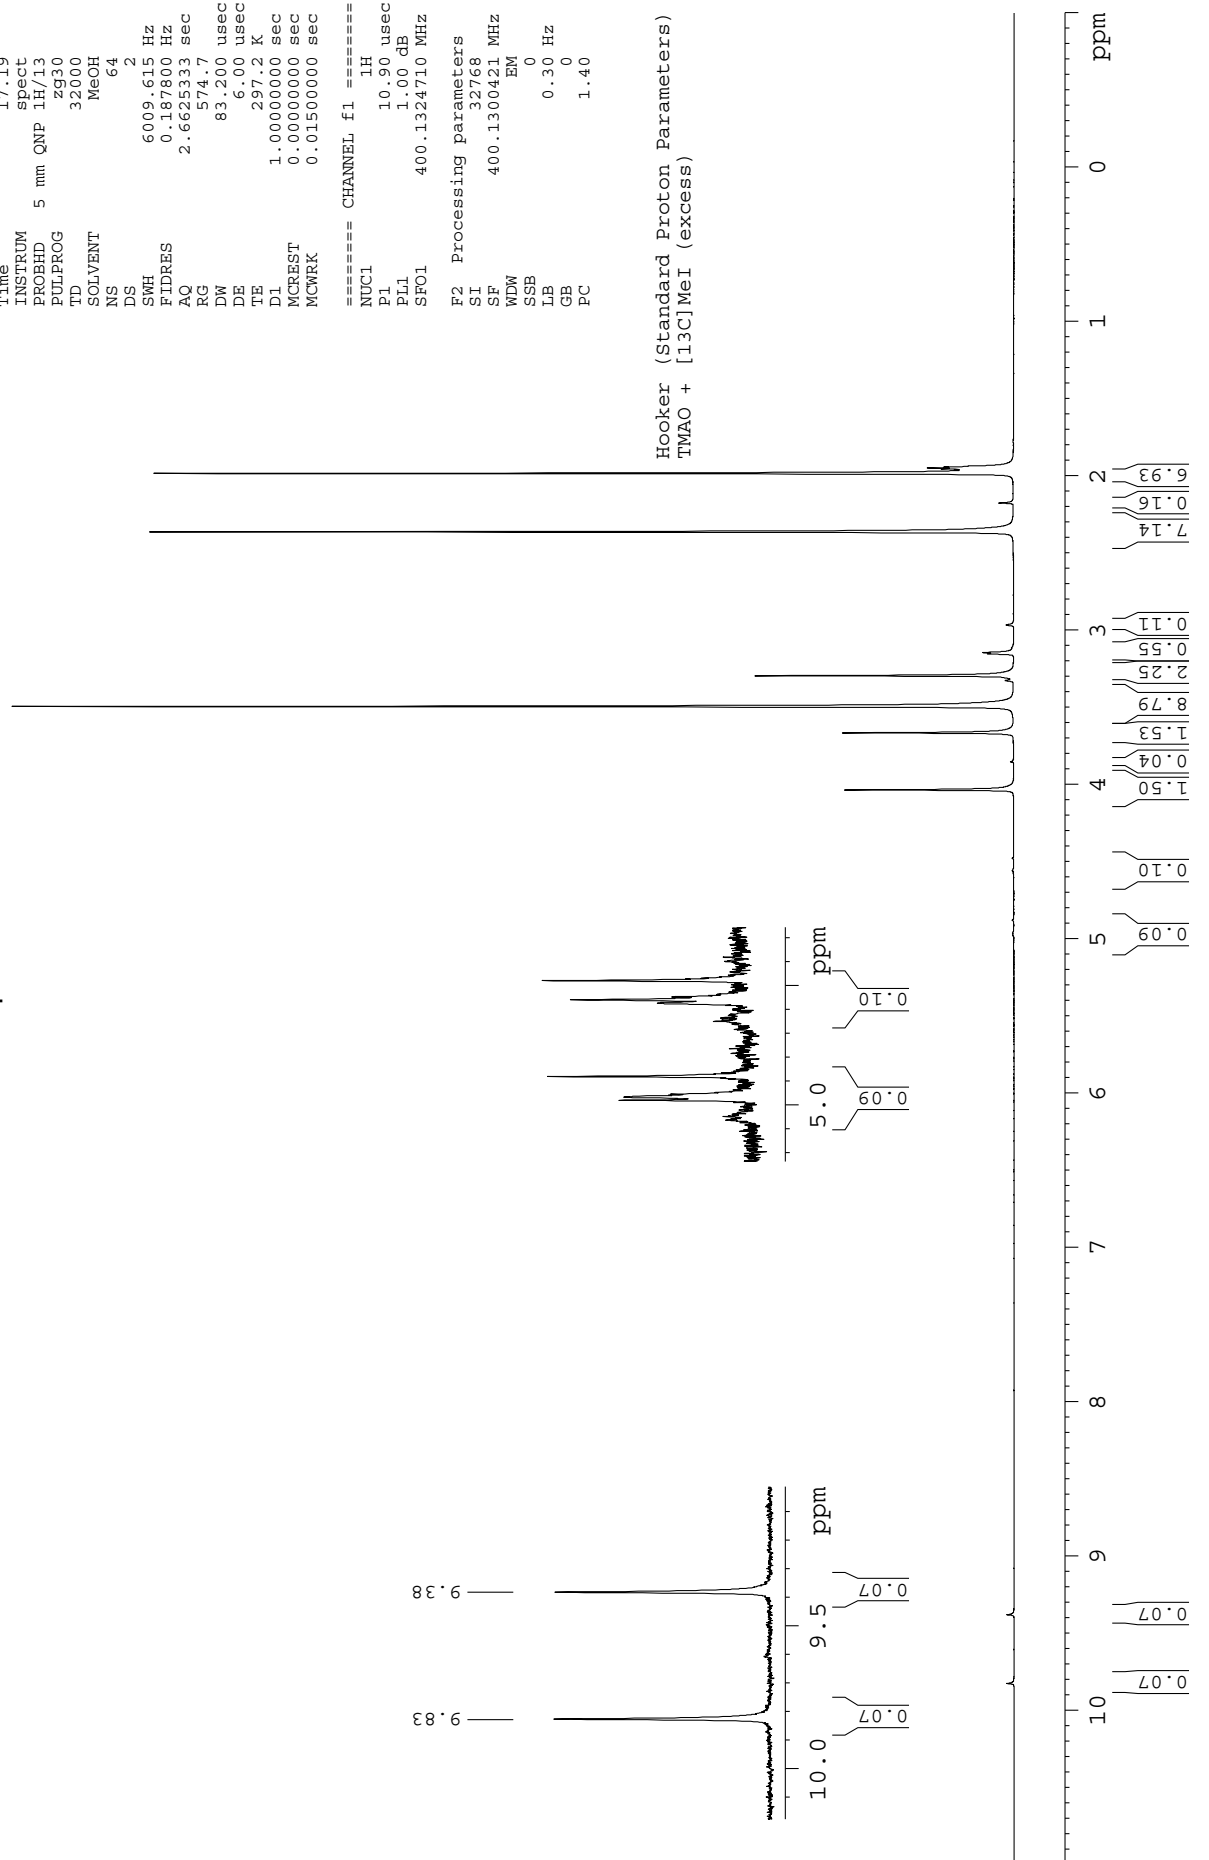

Current Data Parameters  
 NAME jmh01\_77a  
 EXENO 2  
 PROCNO 1

F2 Acquisition Parameters

Date\_ 20080114  
 Time\_ 14.49  
 INSTRUM spect  
 PROBDH 5 mm QNP 1H/13  
 PULPROG zgpg30  
 TD 65536  
 SOLVENT D2O  
 NS 1441  
 DS 4  
 SWH 25062.656 Hz  
 FIDRES 0.382426 Hz  
 AQ 1.3075131 sec  
 RG 7298.2  
 DW 19.950 usec  
 DE 6.00 usec  
 TE 297.2 K  
 D1 1.20000005 sec  
 d11 0.03000000 sec  
 DELTA 1.10000002 sec  
 MCREST 0.00000000 sec  
 MCWRK 0.01500000 sec

==== CHANNEL f1 =====  
 NUC1 13C  
 P1 7.50 usec  
 PL1 0.00 dB  
 SFO1 100.6208180 MHz

==== CHANNEL f2 =====  
 CPDPRG2 waltzi6  
 NUC2 1H  
 PCPD2 80.00 usec  
 PL2 0.00 dB  
 PL12 16.00 dB  
 PL13 16.00 dB  
 SFO2 400.1316005 MHz

F2 Processing parameters  
 SI 32768  
 SF 100.6126816 MHz  
 WDW EM  
 SSB 0  
 LB 1.00 Hz  
 GB 0  
 PC 0.00

TWAO + [12C]MeI (excess)

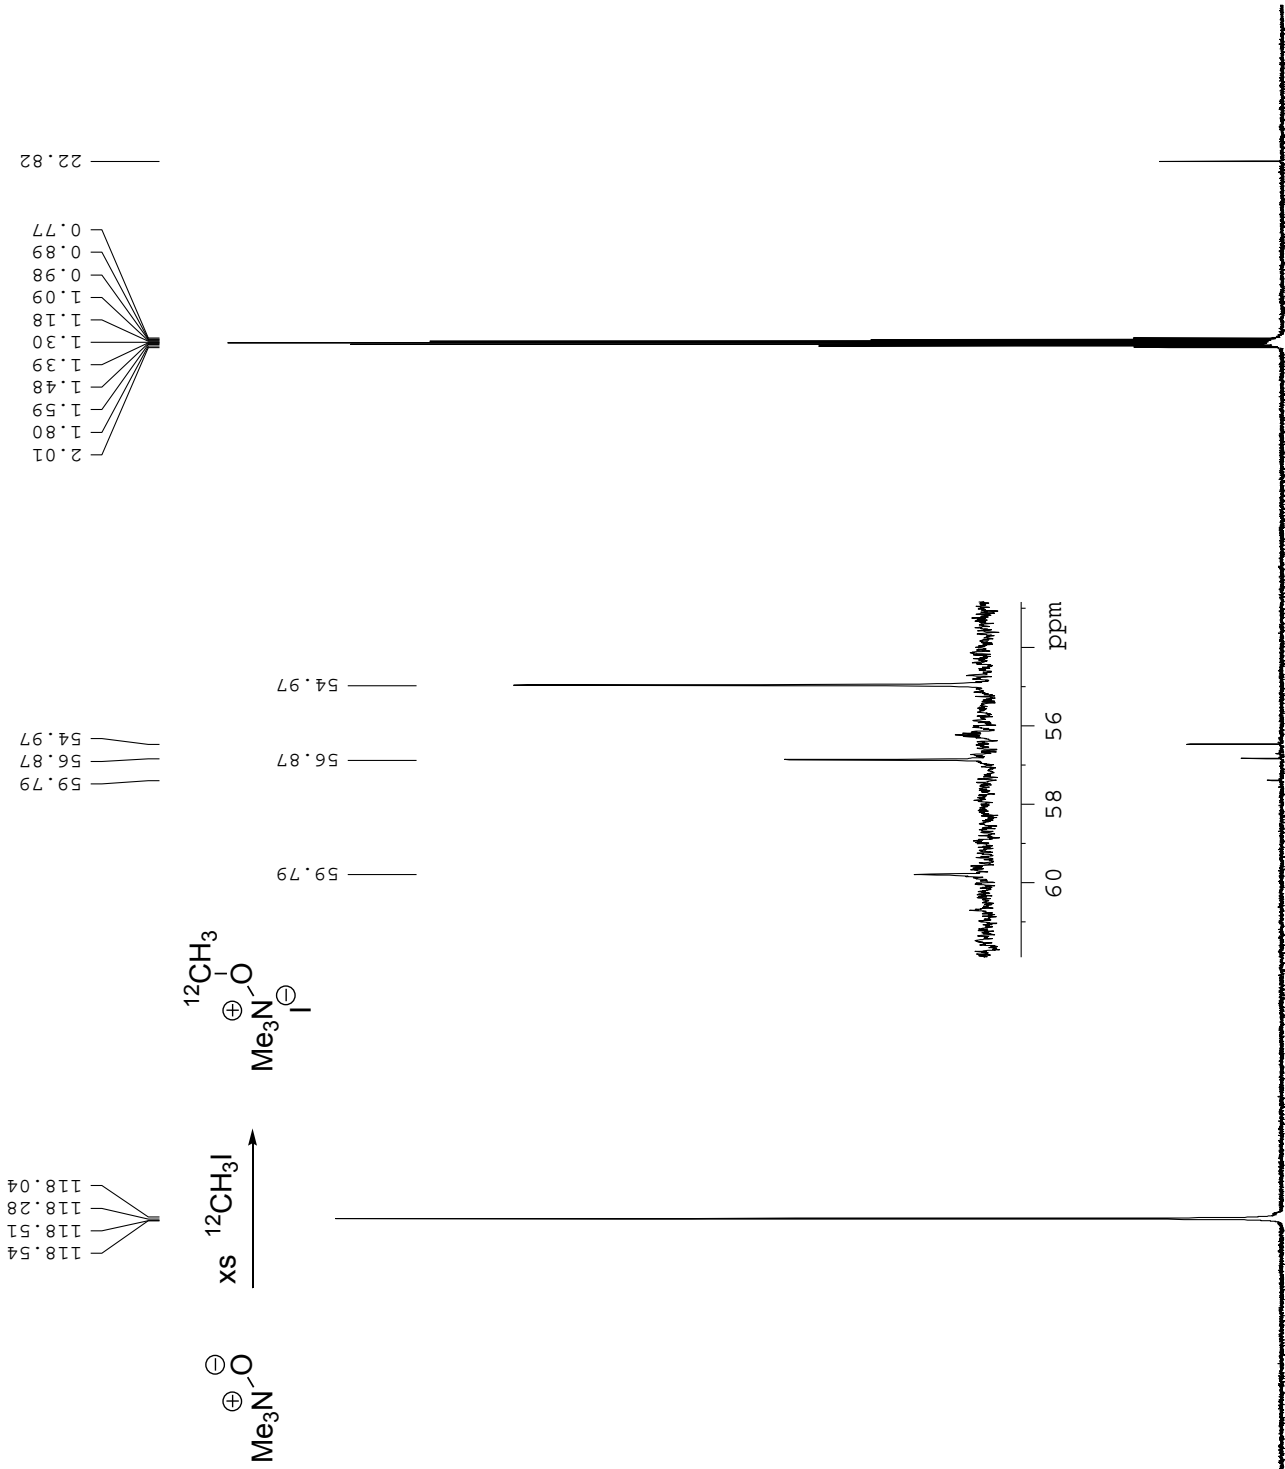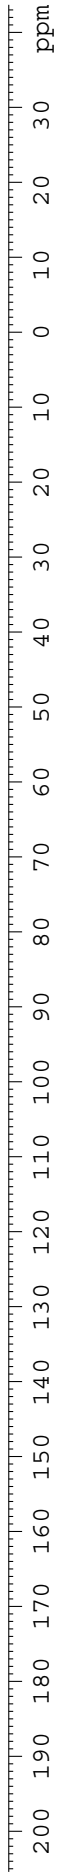

Current Data Parameters  
 NAME jmh01\_77a  
 EXPNO 5  
 PROCNO 1

F2 Acquisition Parameters  
 Date\_ 20080114  
 Time 16.04  
 INSTRUM spect  
 PROBHD 5 mm QNP 1H/13  
 PULPROG zgpg30  
 TD 65536  
 SOLVENT D2O  
 NS 1671  
 DS 4

SWH 25062.656 Hz  
 FIDRES 0.382426 Hz  
 AQ 1.3075131 sec  
 RG 7298.2  
 DW 19.950 usec  
 DE 6.00 usec  
 TE 297.2 K

D1 1.20000005 sec  
 d11 0.03000000 sec  
 DELTA 1.10000002 sec  
 MCREST 0.00000000 sec  
 MCWRK 0.01500000 sec

==== CHANNEL f1 =====  
 NUC1 13C  
 P1 7.50 usec  
 PL1 0.00 dB  
 SFO1 100.6208180 MHz

==== CHANNEL f2 =====  
 CPDPRG2 waltz16  
 NUC2 1H  
 PCPD2 80.00 usec  
 PL2 0.00 dB  
 PL12 16.00 dB  
 PL13 16.00 dB  
 SFO2 400.1316005 MHz

F2 Processing parameters  
 SI 32768  
 SF 100.6126816 MHz  
 WDW EM  
 SSB 0  
 LB 1.00 Hz  
 GB 0  
 PC 1.40

TMAO + [13C]MeI (excess)

197.53  
 118.28  
 86.79  
 85.97  
 83.58  
 59.78  
 57.17  
 56.87  
 56.56  
 56.28  
 56.24  
 56.20  
 54.96  
 2.01  
 1.80  
 1.59  
 1.39  
 1.18  
 0.98  
 0.77  
 16.61  
 18.68  
 20.75  
 21.45  
 21.79  
 22.12  
 22.49  
 22.82  
 23.15  
 23.53  
 23.86  
 24.19

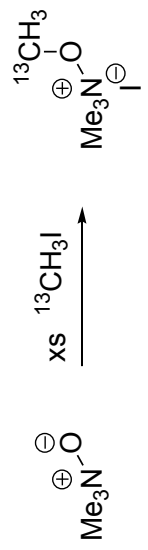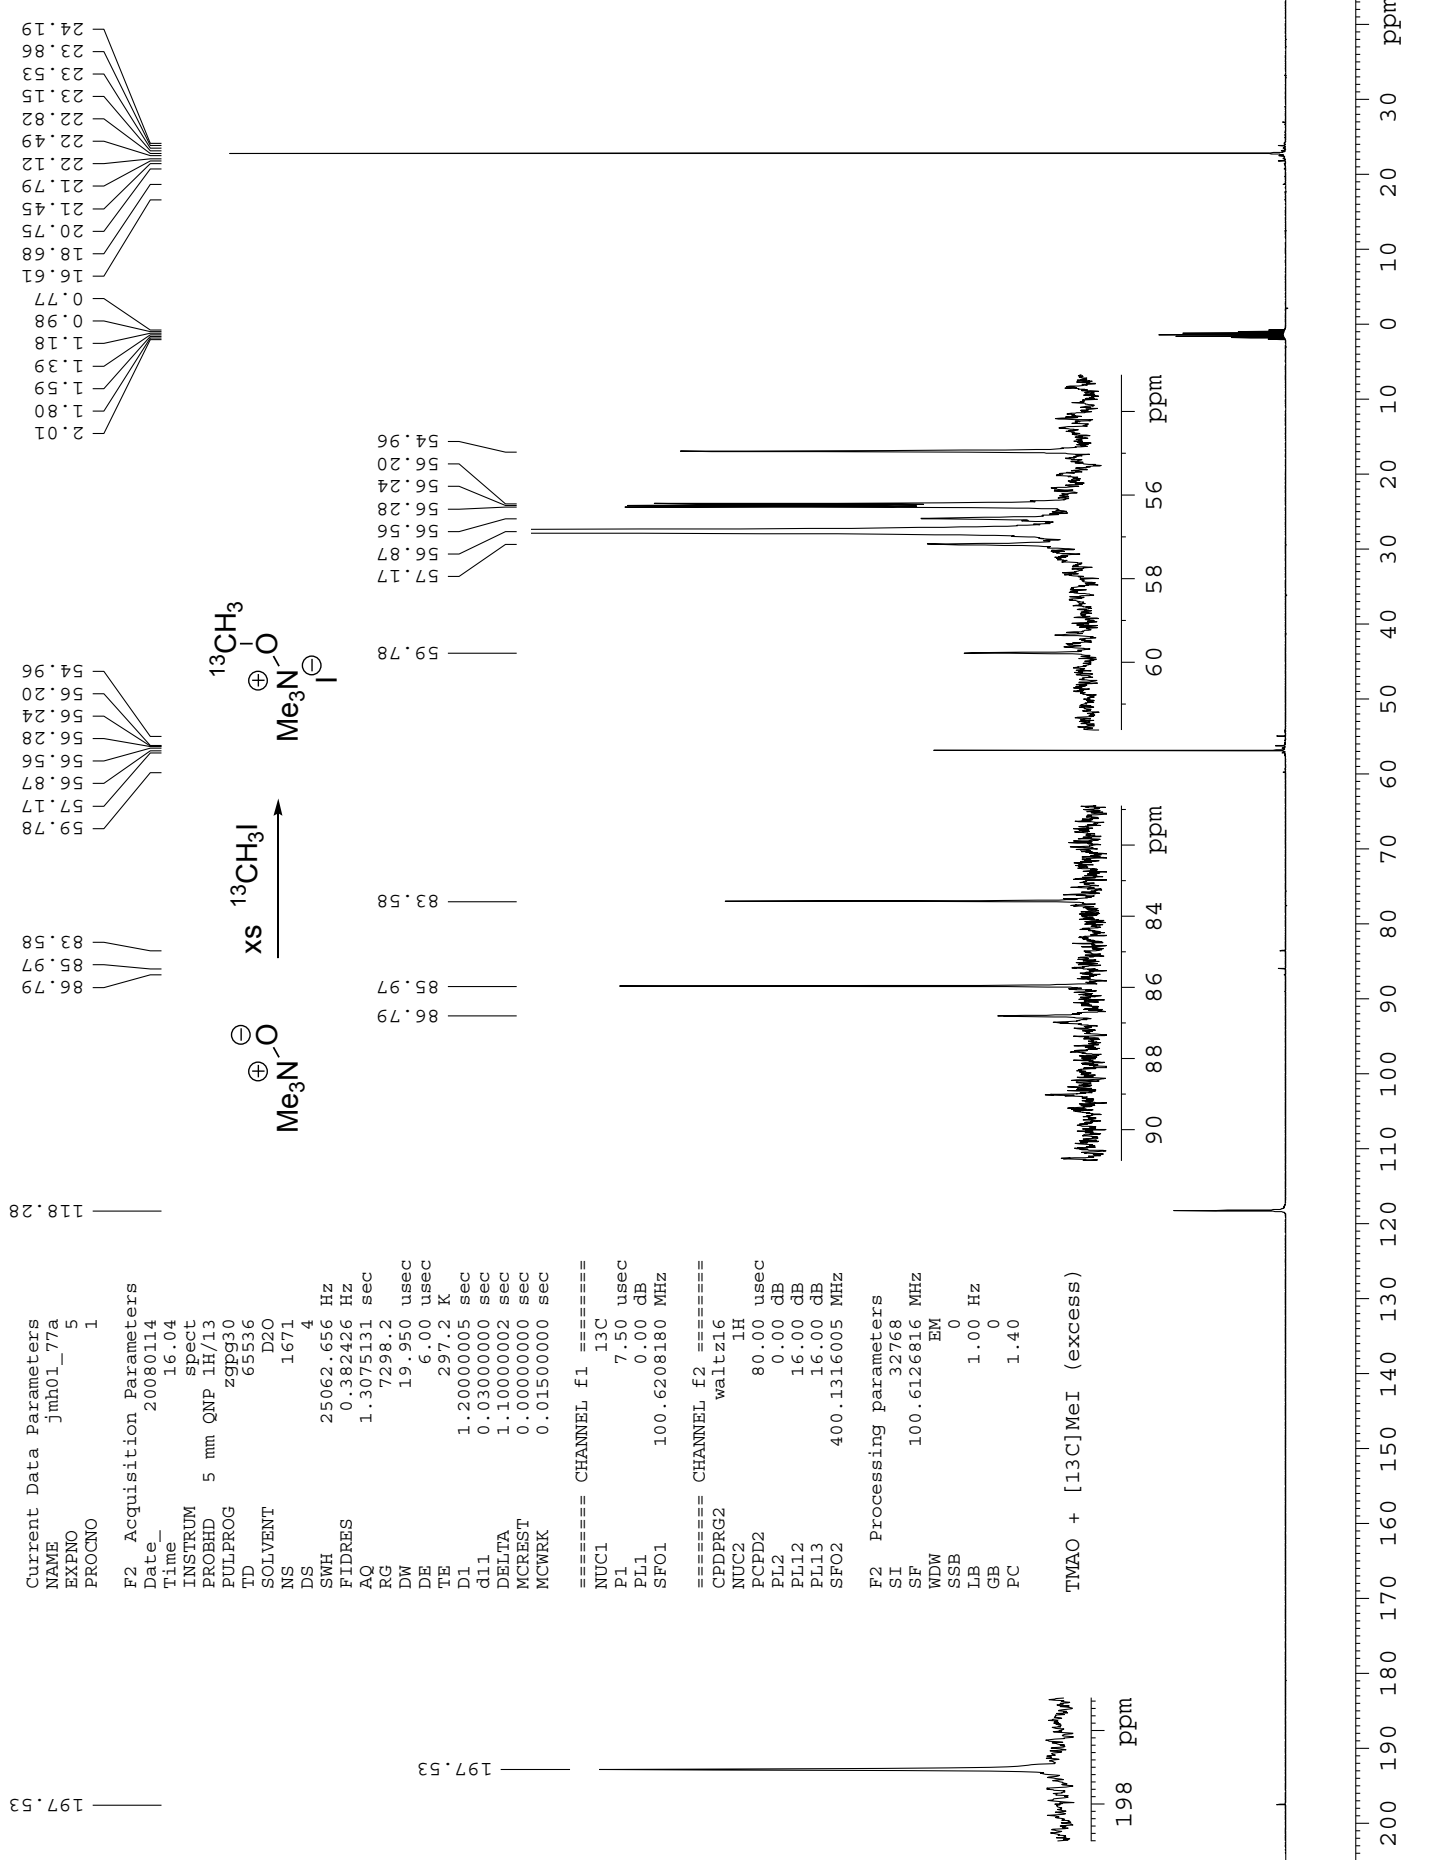

Current Data Parameters  
 NAME jmh01\_79a  
 EXPNO 3  
 PROCNO 1

F2 Acquisition Parameters  
 Date\_ 20080115  
 Time\_ 11.31  
 INSTRUM spect  
 PROBHD 5 mm QNP 1H/13  
 PULPROG zg30  
 TD 32000  
 SOLVENT CD3CN  
 DS 64  
 NS 2  
 SWH 6009.615 Hz  
 FIDRES 0.187800 Hz  
 AQ 2.6625333 sec  
 RG 287.4  
 DW 83.200 usec  
 DE 6.00 usec  
 TE 297.2 K  
 D1 1.00000000 sec  
 MCREST 0.00000000 sec  
 MCWRK 0.01500000 sec

==== CHANNEL f1 =====  
 NUC1 1H  
 P1 10.90 usec  
 PL1 1.00 dB  
 SFO1 400.1324710 MHz  
 F2 Processing parameters  
 SI 32768  
 SF 400.1300330 MHz  
 WDW EM  
 SSB 0  
 LB 0.30 Hz  
 GB 0  
 PC 1.00

1.94  
1.94  
1.95  
1.96  
1.96  
1.96  
2.12  
2.28

2.98  
3.16  
3.24  
3.33

4.70  
4.73  
4.74  
4.76  
4.83  
4.83

4.83  
4.83  
4.76  
4.74  
4.73  
4.70

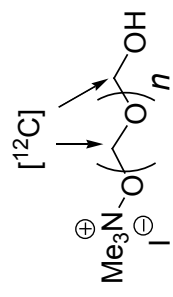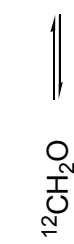

9.60

9.60

0.05

ppm

1.00

4.8 4.7 ppm

Hooker (Standard Proton Parameters)  
 TMAO (excess) + [12C]MeI

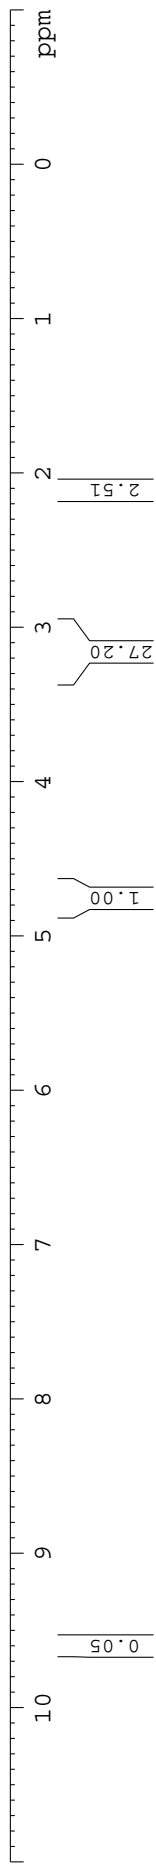

Current Data Parameters  
 NAME jmh01\_79a  
 EXPNO 6  
 PROCNO 1

F2 Acquisition Parameters  
 Date\_ 20080115  
 Time\_ 13.20  
 INSTRUM spect  
 PROBHD 5 mm QNP 1H/13  
 PULPROG zg30  
 TD 32000  
 SOLVENT CD3CN  
 CD3CN 64  
 DS 2  
 SWH 6009.615 Hz  
 FIDRES 0.187800 Hz  
 AQ 2.6625333 sec  
 RG 287.4  
 DW 83.200 usec  
 DE 6.00 usec  
 TE 297.2 K  
 D1 1.00000000 sec  
 MCREST 0.00000000 sec  
 MCWRK 0.01500000 sec

==== CHANNEL f1 =====  
 NUC1 1H  
 P1 10.90 usec  
 PL1 1.00 dB  
 SFO1 400.1324710 MHz  
 F2 Processing parameters  
 SI 32768  
 SF 400.1300350 MHz  
 WDW EM  
 SSB 0  
 LB 0.30 Hz  
 GB 0  
 PC 1.00

Hooker (Standard Proton Parameters)  
 TMAO (excess) + [13C]MeI

1.94  
1.95  
1.96  
2.12  
2.20  
2.28  
2.77  
2.89  
2.98  
3.16  
3.33

4.50  
4.52  
4.54  
4.55  
4.56  
4.61  
4.62  
4.63  
4.64  
4.89  
4.93  
4.95  
4.96  
4.96  
5.02  
5.04  
5.05

4.50  
4.52  
4.54  
4.55  
4.56  
4.61  
4.62  
4.63  
4.64  
4.89  
4.93  
4.95  
4.96  
5.02  
5.04  
5.05

5.0 4.8 4.6  
1.00  
0.03  
1.00

9.82 9.38  
0.08  
0.07

4.82

55.55

1.00  
0.03  
1.00

0.07  
0.08

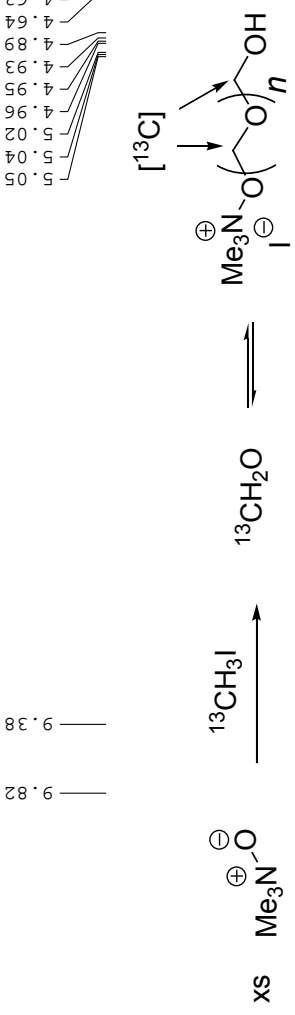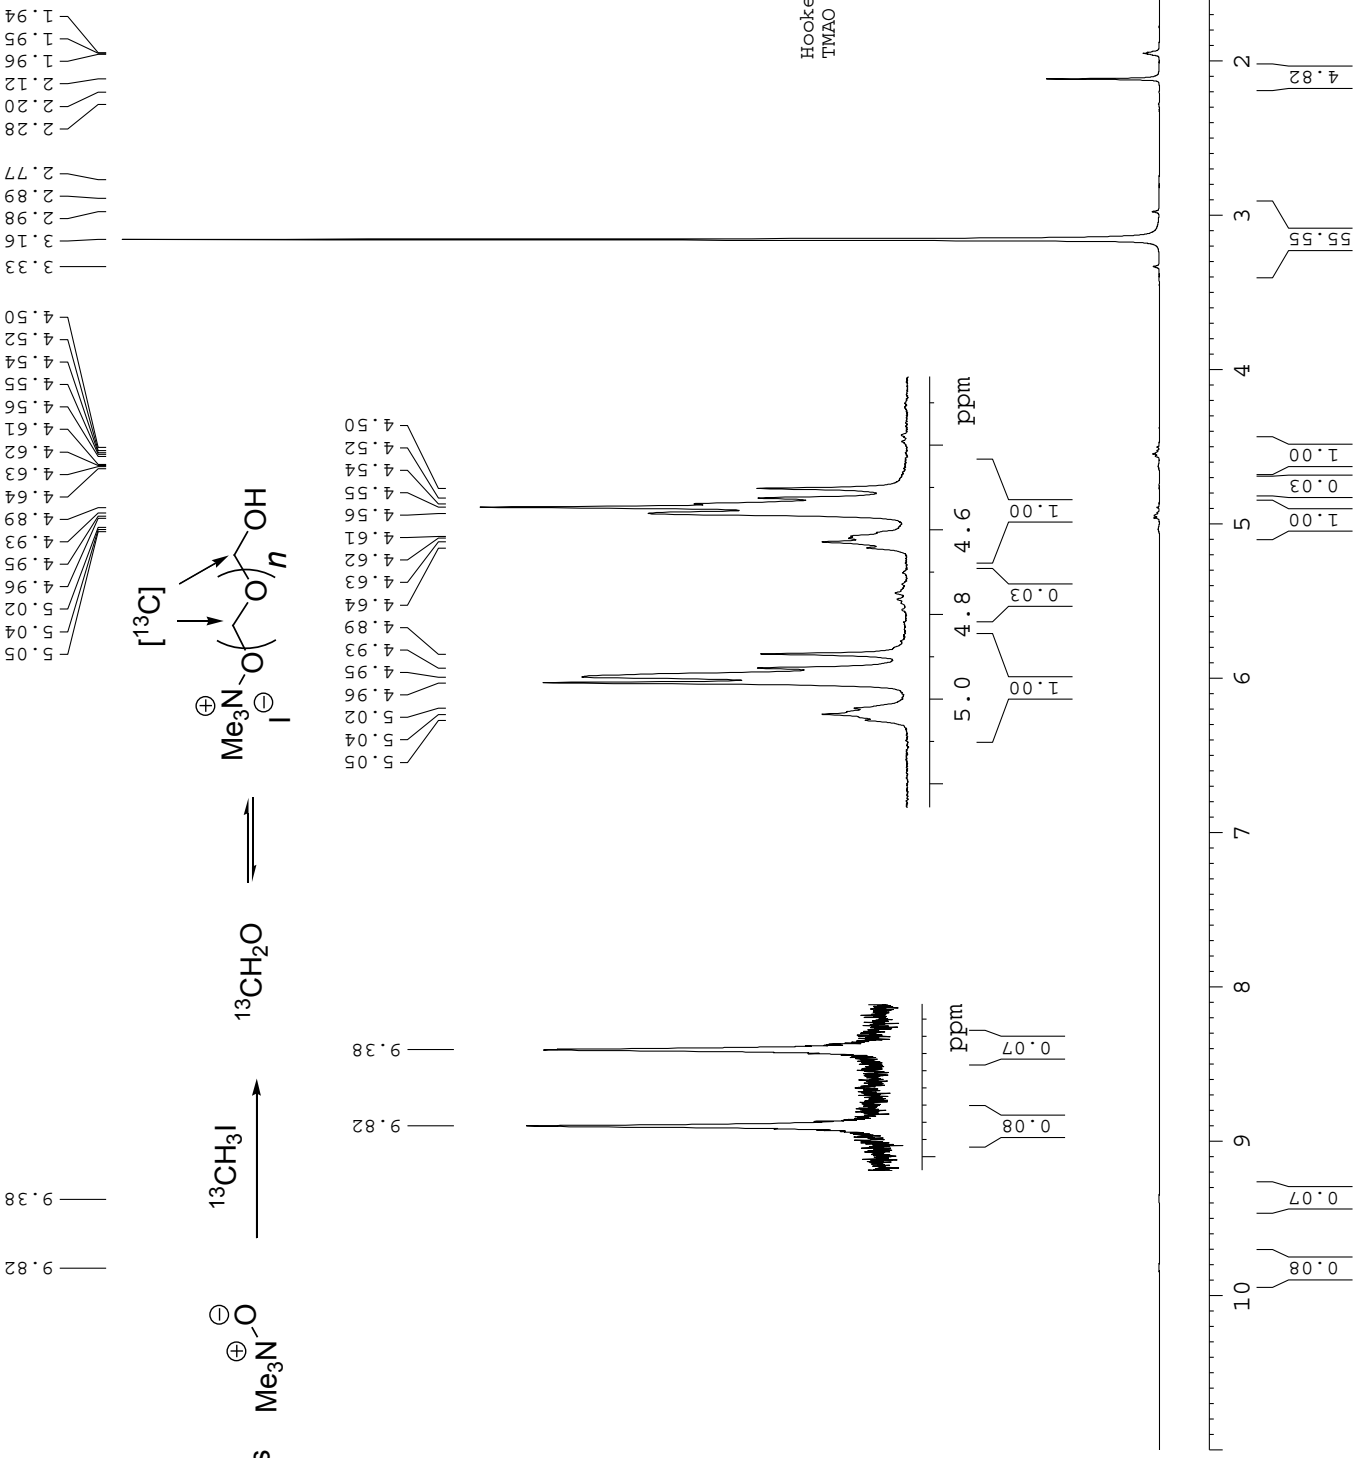



Current Data Parameters  
 NAME jmh01\_79a  
 EXPNO 2  
 PROCNO 1

F2 Acquisition Parameters  
 Date\_ 20080115  
 Time\_ 10.08  
 INSTRUM spect  
 PROBHD 5 mm QNP 1H/13  
 PULPROG zgpg30  
 TD 65536  
 SOLVENT D2O  
 NS 1902  
 DS 4  
 SMH 25062.656 Hz  
 FIDRES 0.382426 Hz  
 AQ 1.3075131 sec  
 RG 7298.2  
 DW 15.950 usec  
 DE 6.00 usec  
 TE 296.2 K  
 D1 1.2000005 sec  
 d11 0.0300000 sec  
 DELTA 1.1000002 sec  
 MCREST 0.0000000 sec  
 MCWRRK 0.0150000 sec

==== CHANNEL f1 =====  
 NUC1 13C  
 P1 7.50 usec  
 PL1 0.00 dB  
 SFO1 100.6208180 MHz  
 ===== CHANNEL f2 =====  
 CPDPRG2 waitz16  
 NUC2 1H  
 FCPD2 80.00 usec  
 PL2 0.00 dB  
 PL12 16.00 dB  
 PL13 16.00 dB  
 SFO2 400.1316005 MHz

F2 Processing parameters  
 SI 32768  
 SF 100.6126763 MHz  
 WDW EM  
 SSB 0  
 LB 1.00 Hz  
 GB 0  
 PC 1.40

TMAO (excess) + [12C]MeI

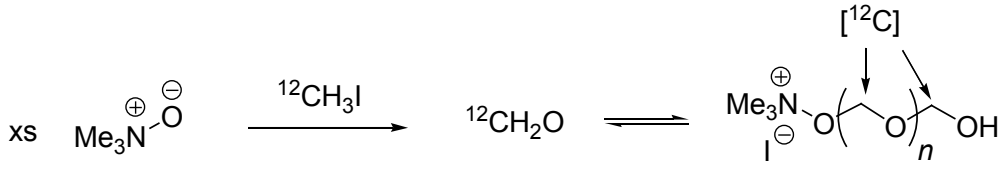

118.35  
 86.60  
 86.41  
 61.04  
 47.86  
 2.18  
 2.01  
 1.81  
 1.60  
 1.39  
 1.19  
 0.98  
 0.77

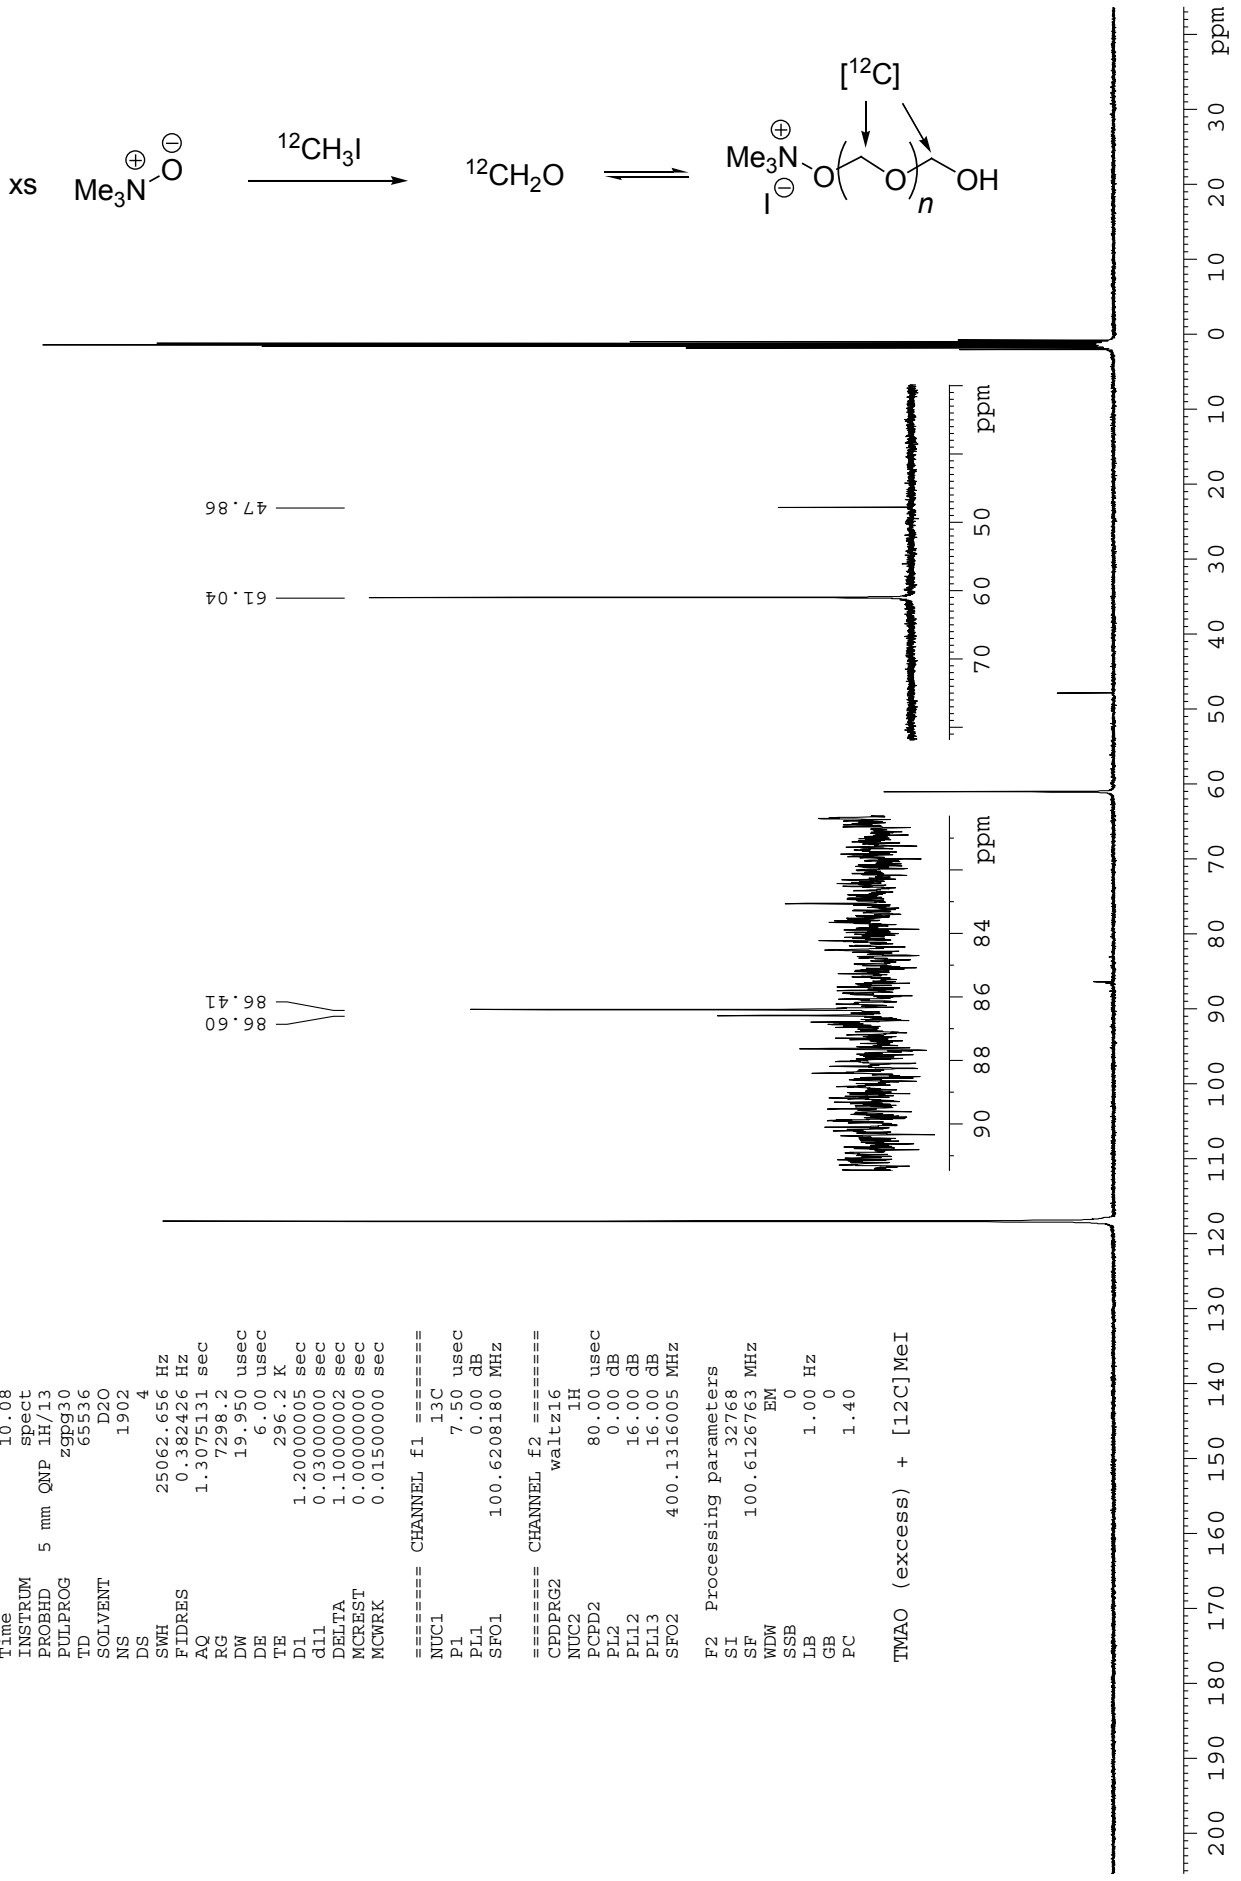

Current Data Parameters  
 NAME jmh01\_79a  
 EXPNO 5  
 PROCNO 1

F2 Acquisition Parameters  
 Date\_ 20080115  
 Time\_ 11.48  
 INSTRUM spect  
 PROBHD 5 mm QNP 1H/13  
 PULPROG zgpg30  
 TD 65536  
 SOLVENT D2O  
 NS 2151  
 DS 4  
 SWH 25062.656 Hz  
 FIDRES 0.382426 Hz  
 AQ 1.3075131 sec  
 RG 7298.2  
 DW 19.950 usec  
 DE 6.00 usec  
 TE 297.2 K  
 D1 1.2000005 sec  
 d11 0.0300000 sec  
 DELTA 1.1000002 sec  
 MCREST 0.0000000 sec  
 MCWRK 0.0150000 sec

==== CHANNEL f1 =====  
 NUC1 13C  
 P1 7.50 usec  
 PL1 0.00 dB  
 SFO1 100.6208180 MHz

==== CHANNEL f2 =====  
 CPDPRG2 waitz16  
 NUC2 1H  
 FCPD2 80.00 usec  
 PL2 0.00 dB  
 PL12 16.00 dB  
 PL13 16.00 dB  
 SFO2 400.1316005 MHz

F2 Processing parameters  
 SI 32768  
 SF 100.6126763 MHz  
 WDW EM  
 SSB 0  
 LB 1.00 Hz  
 GB 0  
 PC 1.40

TMAO (excess) + [13C]MeI

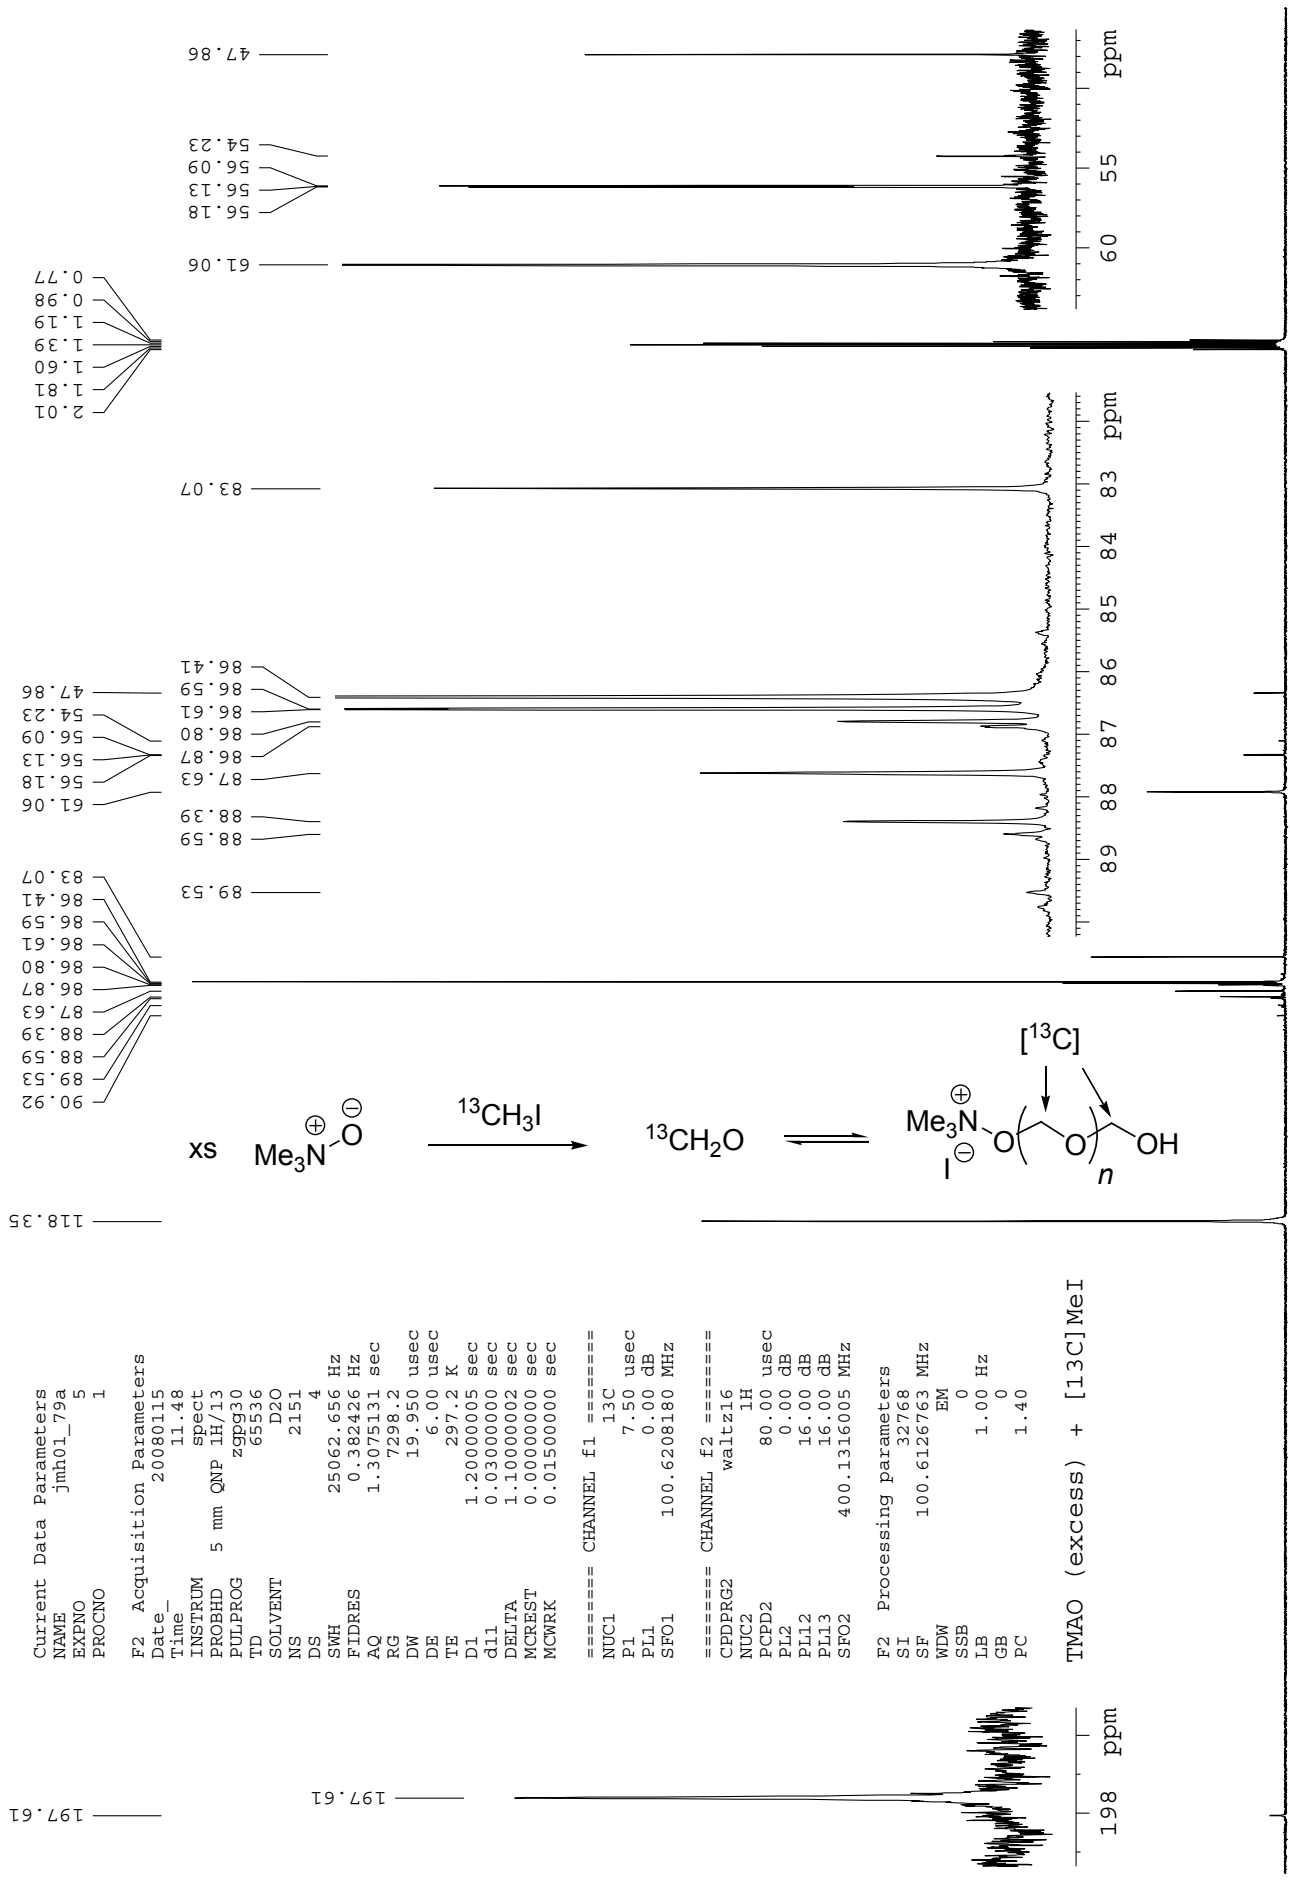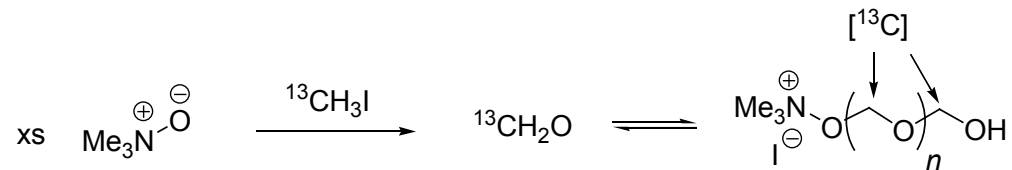

2.01  
1.81  
1.60  
1.39  
1.19  
0.98  
0.77

61.06

83.07  
88.59  
88.39  
61.06  
56.18  
56.13  
56.09  
54.23  
47.86  
86.59  
86.61  
86.80  
86.87  
87.63

89.53

83.07  
86.41  
86.59  
86.61  
86.80  
86.87  
87.63  
88.39  
88.59  
89.53  
90.92  
89.53  
88.59  
88.39  
87.63  
86.87  
86.80  
86.61  
86.59  
86.41

89.53

197.61

197.61

198 ppm
